# Supplementary material for: Bacteremia Antibiotic Length Actually Needed for Clinical Effectiveness (BALANCE) randomised clinical trial: study protocol
Source: PubMed Central journal article supplement — BMJ Open. 2020 May 11;10(5):e038300. doi: 10.1136/bmjopen-2020-038300 (PMC7223357; doi:10.1136/bmjopen-2020-038300), 2020-05-11
Supplement: bmjopen-2020-038300.reviewer_comments.pdf [file bmjopen-2020-038300.reviewer_comments.pdf]

## PEER REVIEW HISTORY

BMJ Open publishes all reviews undertaken for accepted manuscripts. Reviewers are asked to complete a checklist review form (<http://bmjopen.bmj.com/site/about/resources/checklist.pdf>) and are provided with free text boxes to elaborate on their assessment. These free text comments are reproduced below.

## ARTICLE DETAILS

|                            |                                                                                                                                                                                                                |
|----------------------------|----------------------------------------------------------------------------------------------------------------------------------------------------------------------------------------------------------------|
| <b>TITLE (PROVISIONAL)</b> | Bacteremia Antibiotic Length Actually Needed for Clinical Effectiveness (BALANCE) randomized clinical trial: study protocol                                                                                    |
| <b>AUTHORS</b>             | Daneman, Nick; Rishu, Asgar; Pinto, Ruxandra; Arabi, Yaseen; Cook, Deborah; Hall, Richard; McGuinness, SP; Muscedere, John; Parke, Rachael; Reynolds, Steven; Rogers, Benjamin; Shehabi, Yahya; Fowler, Robert |

This article was not externally reviewed at BMJ Open. Protocols that have been independently assessed prior to submission to BMJ Open are usually fast-tracked to publication on the grounds that further substantial changes will not be possible. This independent assessment will usually be external, independent review for both a substantial grant award from a non-commercial or government funder and ethics approval.
