# Supplementary material for: Bacteremia Antibiotic Length Actually Needed for Clinical Effectiveness (BALANCE) randomised clinical trial: study protocol
Source: PubMed Central journal article supplement — BMJ Open. 2020 May 11;10(5):e038300. doi: 10.1136/bmjopen-2020-038300 (PMC7223357; doi:10.1136/bmjopen-2020-038300), 2020-05-11
Supplement: bmjopen-2020-038300supp002.pdf [file bmjopen-2020-038300supp002.pdf]

**Following research ethics committees approved the study for participating sites:**

Clinical Trials Ontario (CTO), Toronto, ON Canada

THP Research Ethics Board, Trillium Health, Mississauga Canada

Quebec Provincial approval through Comité d'éthique de la recherche du CIUSSS de l'Estrie

– CHUS, Sherbrooke, QC Canada

Research Ethics Board, McGill University, QC Canada

University of Manitoba Health Research Ethics Board, Winnipeg, MB Canada

Research Ethics Office, University of Alberta, Edmonton, AB Canada

The Conjoint Health Research Ethics Board (CHREB), University of Calgary, AB Canada

The UBC-PHC Research Ethics Board, Vancouver, BC Canada

Clinical Research Ethics Board, Vancouver, BC Canada

Capital Health Research Ethics Board, Halifax, NS Canada

Cleveland Clinic Institutional Review Board, Ohio USA

Office of Science and Research Institutional Review, New York School of Medicine, NY USA

Institutional Review Board Committee, Jeddah KSA

Institutional Review Board Committee, (KAIMRC), Riyadh KSA

Rabin Medical Centre, Tel Aviv University, Israel

Monash Health Human Research Ethics Committee (HREC) approved following sites in

Australia:

- Monash Health, Australia

- Mater Hospital, Australia

- Westmead Hospital, Australia

- Cabrini Hospital, Australia

- St Vincent's Hospital Sydney, Australia

- Bendigo Health, Australia

- Royal North Shore Hospital, Australia
- Alfred Health, Australia
- Sunshine Coast Hospital, Australia
- Logan Hospital, Australia

Northern A Health and Disability Ethics Committee, Auckland City Hospital approved study for sites in New Zealand.
